# Supplementary material for: Hierarchical Co–Pi Clusters/Fe2O3 Nanorods/FTO Micropillars 3D Branched Photoanode for High-Performance Photoelectrochemical Water Splitting
Source: MDPI journal article supplement (doi:10.3390/nano12203664), 2022-10-18
Supplement: s1 [file s1]

Supplementary Materials

# **Hierarchical Co–Pi Clusters/Fe<sub>2</sub>O<sub>3</sub> Nanorods/FTO Micropillars 3D Branched Photoanode for High-Performance Photoelectrochemical Water Splitting**

**Nakhyun Kim <sup>1,†</sup>, Sucheol Ju <sup>2,†</sup>, Jisung Ha <sup>2</sup>, Hojung Choi <sup>2</sup>, Hansang Sung <sup>2</sup> and Heon Lee <sup>1,2,\*</sup>**

<sup>1</sup> Department of Semiconductor Systems Engineering, Korea University, Anam-ro 145, Sungbuk-Gu, Seoul 136-701, Korea

<sup>2</sup> Department of Materials Science and Engineering, Korea University, Anam-ro 145, Sungbuk-Gu, Seoul 136-701, Korea

\* Correspondence: heonlee@korea.ac.kr

† These authors contributed equally to this work.

## Supplementary Materials

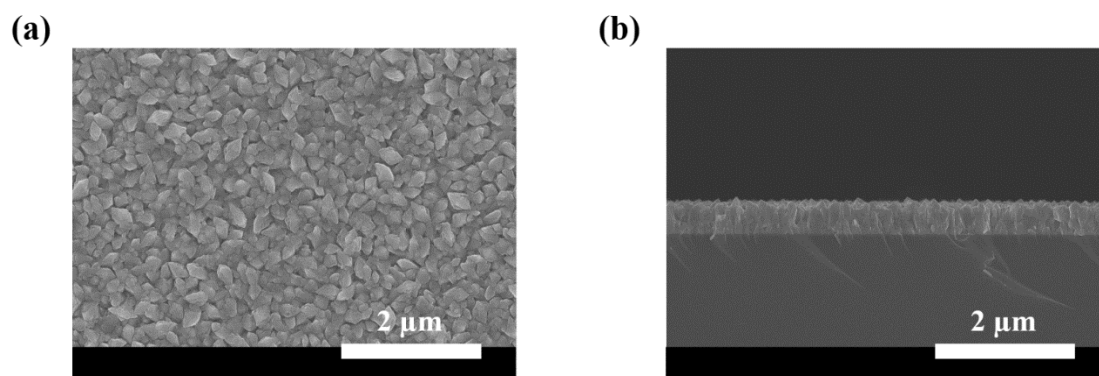

Figure S1. SEM images of FTO-F.

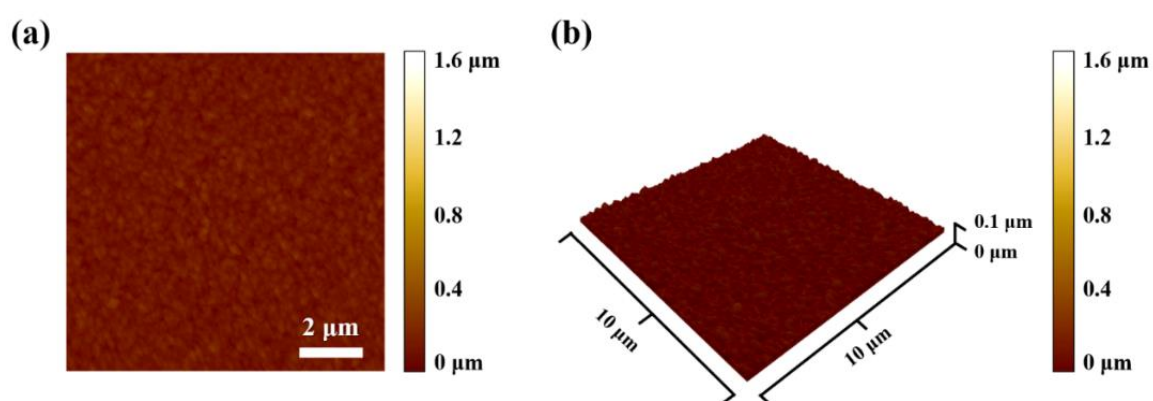

Figure S2. AFM results for FTO-F.

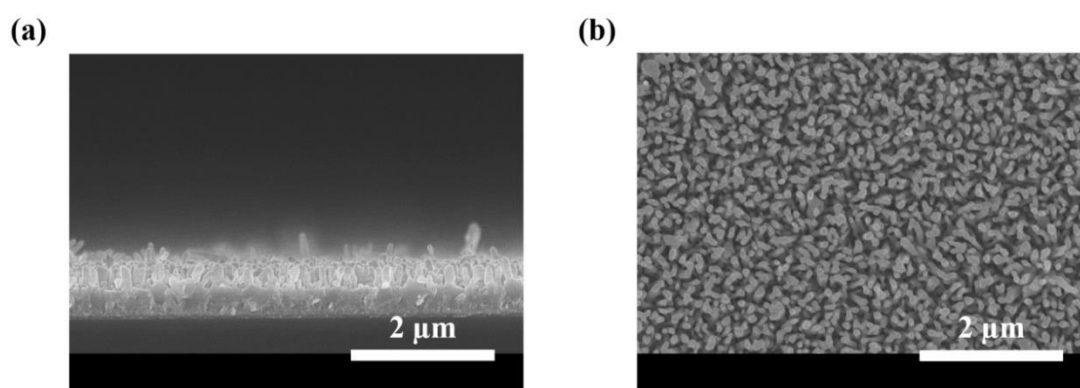

Figure S3. SEM images of the  $\text{Fe}_2\text{O}_3$  nanorods on FTO-F.

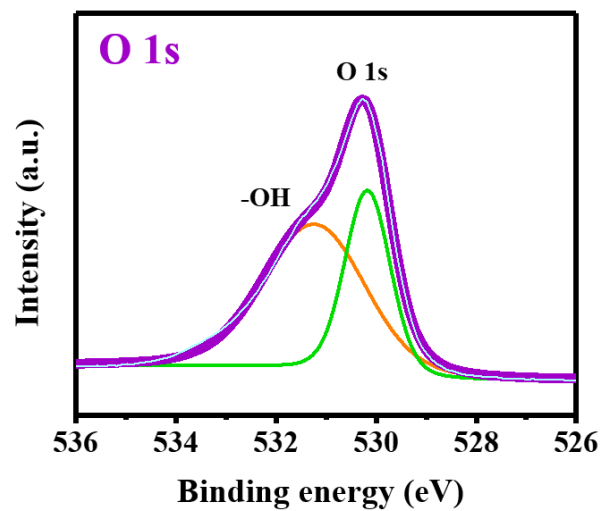

**Figure S4.** XPS profile of O1s from the Fe<sub>2</sub>O<sub>3</sub>/Co-Pi sample.

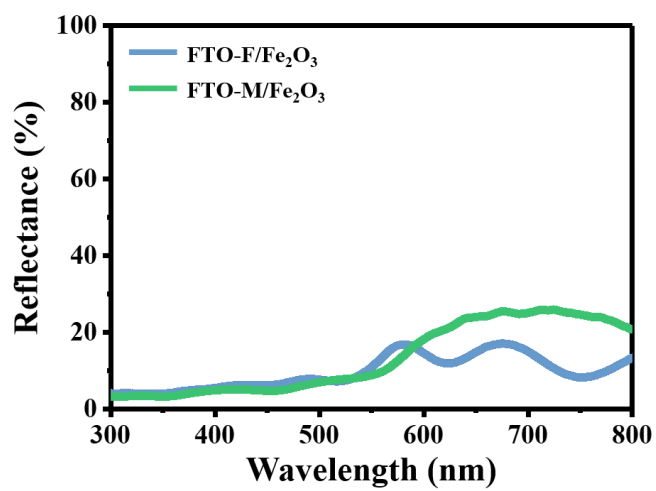

**Figure S5.** Reflectance of flat Fe<sub>2</sub>O<sub>3</sub> and Fe<sub>2</sub>O<sub>3</sub>-M.

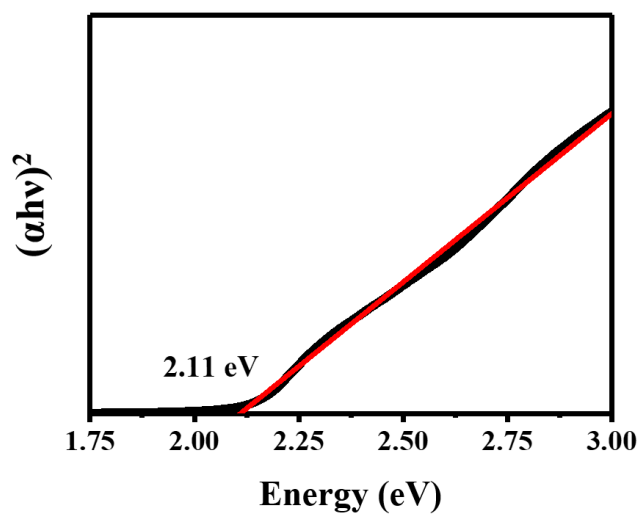

**Figure S6.** Tauc plot of flat Fe<sub>2</sub>O<sub>3</sub>.

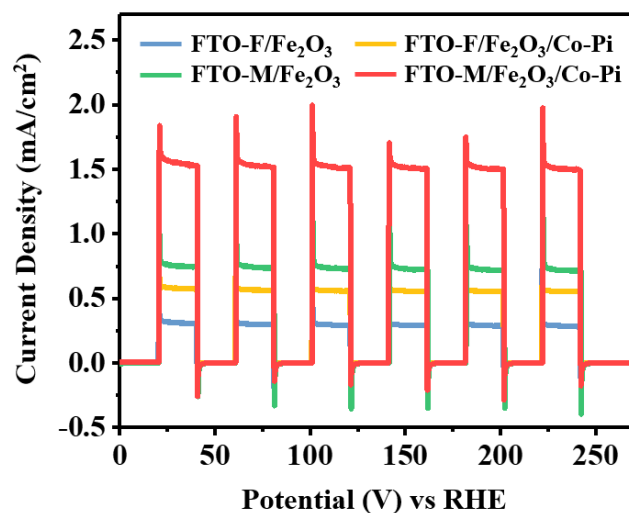

**Figure S7.** Transient photocurrents of FTO-F/Fe<sub>2</sub>O<sub>3</sub>, FTO-M/Fe<sub>2</sub>O<sub>3</sub>, FTO-F/Fe<sub>2</sub>O<sub>3</sub>/Co-Pi, and FTO-M/Fe<sub>2</sub>O<sub>3</sub>/Co-Pi in 1 M of NaOH under illumination.

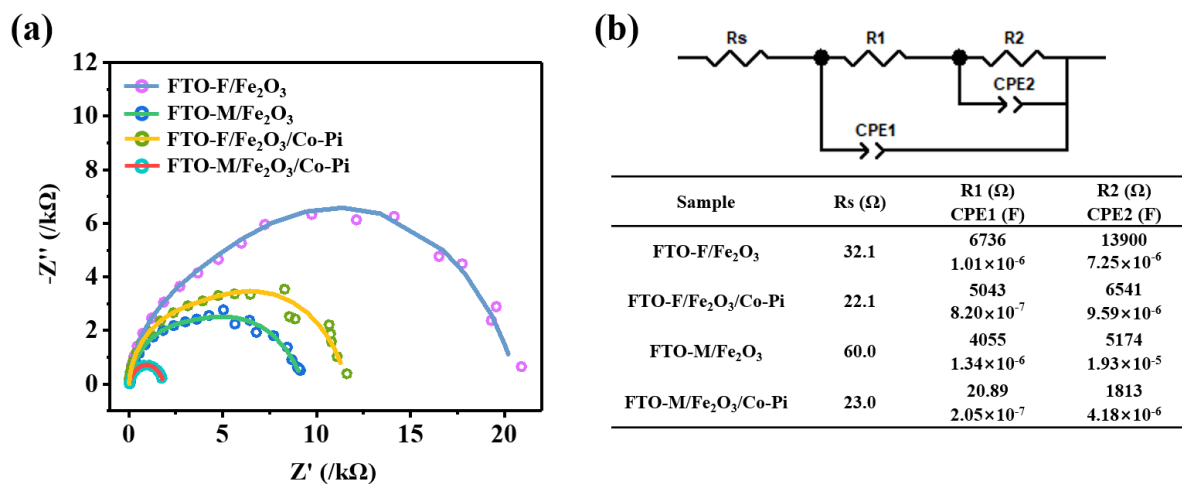

**Figure S8.** (a) Nyquist plots from electrochemical impedance spectroscopy (EIS). (b) the equivalent circuit model from the fitting results.
